1  
2  
3  
4  
5  
6  
7  
8  
9  
10  
11  
12  
13  
14  
15  
16  
17  
18  
19

**Title:**

**Genetic Variant in 3' Untranslated Region of the Mouse *Pycard* Gene Regulates Inflammasome Activity**

**Running Title:**

3'UTR SNP in *Pycard* regulates inflammasome activity

**Authors:**

Brian Ritchey<sup>1\*</sup>, Qimin Hai<sup>1\*</sup>, Juying Han<sup>1</sup>, John Barnard<sup>2</sup>, Jonathan D. Smith<sup>1,3</sup>

<sup>1</sup>Department of Cardiovascular & Metabolic Sciences, Lerner Research Institute, Cleveland Clinic, Cleveland, OH 44195

<sup>2</sup>Department of Quantitative Health Sciences, Lerner Research Institute, Cleveland Clinic, Cleveland, OH 44195

<sup>3</sup>Department of Molecular Medicine, Cleveland Clinic Lerner College of Medicine of Case Western Reserve University, Cleveland, OH 44195

<sup>\*</sup>, These authors contributed equally to this study.

Address correspondence to Jonathan D. Smith: email [smithj4@ccf.org](mailto:smithj4@ccf.org); ORCID ID 0000-0002-0415-386X; mailing address: Cleveland Clinic, Box NC-10, 9500 Euclid Avenue, Cleveland, OH 44195, USA.

## 20 Abstract

21 Quantitative trait locus mapping for interleukin-1 $\beta$  release after inflammasome priming and activation  
22 was performed on bone marrow-derived macrophages (BMDM) from an AKRxDBA/2 strain intercross.  
23 The strongest associated locus mapped very close to the *Pycard* gene on chromosome 7, which codes  
24 for the inflammasome adaptor protein apoptosis-associated speck-like protein containing a CARD (ASC).  
25 The DBA/2 and AKR *Pycard* genes only differ at single nucleotide polymorphism (SNP) in their 3'  
26 untranslated region (UTR). DBA/2 vs. AKR BMDM had increased levels of *Pycard* mRNA expression and  
27 ASC protein, and increased inflammasome speck formation, which was associated with increased *Pycard*  
28 mRNA stability without an increased transcription rate. CRISPR/Cas9 gene editing was performed on  
29 DBA/2 embryonic stem cells to change the *Pycard* 3'UTR SNP from the DBA/2 to the AKR allele. This  
30 single base change significantly reduced *Pycard* expression and inflammasome activity after cells were  
31 differentiated into macrophages due to reduced *Pycard* mRNA stability.

## 32 Introduction

33 Genetic differences between inbred mouse strains have facilitated the discovery of many disease genes  
34 and pathways, as well as modifier genes, through the use of quantitative trait locus (QTL) mapping and  
35 molecular technologies. Our groups has focused on the AKR and DBA/2 mouse strains to interrogate  
36 genes and pathways associated with atherosclerosis, along with several macrophage phenotypes that  
37 may contribute to atherosclerosis pathology. We previously observed that 16-week-old chow diet-fed  
38 DBA/2 vs. AKR mice develop ~ 10-fold larger aortic root atherosclerotic lesions after breeding  
39 hyperlipidemic apoE knockout mice onto these distinct genetic backgrounds. This divergent  
40 atherosclerosis phenotype was observed in both males and females (1). Two independent strain  
41 intercrosses were performed and QTL analysis identified three significant loci associated with lesion  
42 area, called *Ath28*, *Ath22*, and *Ath26*, on chromosomes 2, 15, and 17, respectively (2). We subsequently  
43 identified the *Cyp4f13* gene as an atherosclerosis modifier gene at the *Ath26* locus (3). However, we  
44 observed that even within inbred apoE knockout mice, there was a large coefficient of variation (~50%)  
45 in early aortic root lesion area. Since early mouse atherosclerotic lesions are dominated by the  
46 accumulation of intimal macrophages (4), we performed an additional AKRxDBA/2 strain intercross to  
47 specifically identify candidate genes for bone marrow-derived macrophage (BMDM) phenotypes, which  
48 might also effect atherosclerosis severity. We discovered that *ex vivo* macrophage phenotypes are  
49 generally less variable than atherosclerotic lesion size, which facilitates more robust and precise genetic  
50 mapping and therefore faster and more reliable candidate gene identification. We identified the *Soat1*  
51 and *Gpnmb* genes as strong modifier gene candidates for macrophage cholesterol metabolism and  
52 lysosome function, respectively; and, we used CRIPR/Cas9 gene editing to validate them as causal  
53 modifier genes (5, 6).

54 In the current study, we assessed IL-1 $\beta$  release from macrophages after inflammasome priming with LPS  
55 and activation with ATP; and, we discovered ~ two-fold more IL-1 $\beta$  was released from DBA/2 vs. AKR  
56 BMDM. IL-1 $\beta$  is an inflammatory cytokine, and its role in human atherosclerotic disease was proven in  
57 the CANTOS trial, where anti-IL-1 $\beta$  monoclonal antibody infusions led to a significant reduction in  
58 nonfatal myocardial infarction, stroke, or cardiovascular death (7). The goal of this study was to identify  
59 and validate candidate genes that contribute to the divergent macrophage inflammasome/IL-1 $\beta$   
60 phenotype between AKR and DBA/2 mice. Additionally, we sought to gain mechanistic insight into how  
61 these genes influence this phenotype at a molecular level. Using cryopreserved bone marrow samples

62 from the same F<sub>4</sub> strain intercross we utilized in a previous study (5), we prepared BMDM, primed and  
63 activated inflammasomes, and measured IL-1 $\beta$  released into the media. QTL mapping identified a  
64 strong locus on the distal end of chromosome 7, which we named inflammatory response modulator 3  
65 (*Irm3*). The *Irm3* QTL interval is located within a larger QTL on chromosome 7 that was previously  
66 identified in genetic studies from high and low inflammatory responder recombinant partially inbred  
67 strains derived from an intercross of 8 parental inbred mouse strains, including the DBA/2 strain used in  
68 the current study (8). *Irm3* harbors the *Pycard* gene, which codes for the ASC adaptor protein required  
69 for assembly of the majority of canonical inflammasomes. Additionally, QTLs on chromosomes 2, 11,  
70 and 16 reached statistical significance after correcting for *Irm3*. Here, we describe the identification and  
71 validation of *Pycard* as the *Irm3* causal modifier gene, and rs33183533 in the 3' untranslated region  
72 (UTR) as the causal genetic variant, which alters *Pycard* mRNA turnover.

## 73 Results

### 74 ***Pycard* was identified as a strong candidate gene for the modulation of macrophage IL-1 $\beta$ secretion**

75 DBA/2 vs. AKR BMDM release ~ two-fold more IL-1 $\beta$  after priming with LPS and subsequent  
76 inflammasome activation via ATP treatment (Fig. 1A). To identify genetic loci responsible for the  
77 difference in BMDM IL-1 $\beta$  release (a measure of inflammasome activity) between these strains, QTL  
78 mapping was performed. Parental AKR and DBA/2 mice were crossed to generate an F<sub>1</sub> population, and  
79 their progeny, as well as the progeny of subsequent generations, were brother-sister mated to produce  
80 a population of 122 genetically diverse AKR $\times$ DBA/2 F<sub>4</sub> mice. These F<sub>4</sub> mice were genotyped via a dense  
81 mouse SNP array, which revealed the desired tapestry of genetic recombination among the cohort (5),  
82 with an average of >2 recombination events per chromosome. BMDM were cultured from these mice  
83 and subjected to LPS priming and subsequent ATP treatment. The levels of secreted IL-1 $\beta$  normalized to  
84 cellular protein from the F<sub>4</sub> BMDM were positively skewed, so a log<sub>10</sub> transformation was performed to  
85 achieve a normal distribution, which is required for subsequent analyses that utilize linear regression  
86 models. There was no sex effect on IL-1 $\beta$  levels, and both sexes were used. QTL mapping was  
87 performed to identify regions in the genome where genetic variation was significantly associated with  
88 phenotypic variation. A highly significant QTL mapped to distal chromosome 7 (log<sub>10</sub> of the odds score  
89 (LOD) = 8.60, peak position = 134.80 Mb), which we named inflammatory response modulator 3 (*Irm3*)  
90 in accordance with Mouse Genome Informatics nomenclature conventions (Fig. 1B). Loci on  
91 chromosome 2 (147Mb, LOD = 3.79) and chromosome 11 (73Mb, LOD = 3.85) were highly suggestive,  
92 falling just short of the genome-wide significance threshold of LOD = 4.02 ( $\alpha$  = 0.05) determined by  
93 permutation analysis. After correcting for *Irm3* by using its peak marker genotypes as an additive  
94 covariate, loci on chromosomes 2, 11, and 16 reached genome-wide significance, and were named *Irm4*,  
95 *Irm5*, and *Irm6*, respectively (Fig. 1C).

96 *Irm3* has a Bayesian credible interval (probability > 0.95 for the causal gene(s) to reside in the interval) of  
97 134.80-138.45 Mb, which contains 66 genes (Supplemental Table S1). Separating the F<sub>4</sub> BMDM by their  
98 genotype at the *Irm3* locus revealed an additive gene dose response for log IL-1 $\beta$  release, with an R<sup>2</sup>  
99 value of 0.28 (p<0.0001 by ANOVA linear trend test) indicating that this locus is associated with 28% of  
100 the variance in IL-1 $\beta$  release among the F<sub>4</sub> BMDM (Fig. 1D). *Pycard* was selected as the top candidate  
101 gene based on its established role in inflammasome assembly, its proximity to the QTL peak (0.33 Mb),  
102 and the presence of a strong cis-expression QTL (eQTL, showing genetic variation near that gene is  
103 associated with its expression) with a LOD score of 20.0 determined in our prior BMDM transcriptomic

104 study based on an independent intercross of the same two parental strains (2). Only 3 of the 66 genes  
105 in this interval had nonsynonymous SNPs (*Zfp646*, *Bag3*, *Dmbt1*), but none of these SNPs were predicted  
106 to alter protein function based on in silico PROVEAN analysis (9) (Supplemental Table S1). There was  
107 one other gene in this interval that we previously found to have a cis-eQTL (*Rgs10*), with a marginal LOD  
108 score of 2.6 (2). Taken together, these data suggest that genetic variability within or flanking the *Pycard*  
109 gene plays a causal role in manifesting the divergent levels of secreted IL-1 $\beta$  in AKR vs. DBA/2 BMDM,  
110 potentially due to differences in *Pycard* gene expression. There is only one SNP (rs33183533) within the  
111 *Pycard* gene between the AKR and DBA/2 parental strains, which resides in the 3' UTR. There are also  
112 two known upstream SNPs (rs31253258, rs33187231; 5602 and 7736 bp upstream, respectively) and  
113 one downstream SNP (rs33182327; 913 bp distal to gene) within 10 kb of the gene. The Sanger Mouse  
114 Genomes Project (REL-1505) shows that the 3' UTR SNP rs33183533 DBA/2 allele (T on the coding  
115 strand) is the same as the C57BL/6J reference genome allele. Additionally, 24 of the 36 other mouse  
116 strains sequenced had a T allele at the 3' UTR SNP, while the AKR allele (A on the coding strand) is shared  
117 by 12 of the 36 other mouse strains (10). We performed overlapping PCR (Supplemental Table S2) of  
118 AKR and DBA/2 genomic DNA covering the entire *Pycard* gene plus 456 bp and 2,361 bp of upstream  
119 and downstream flanking region (5310 bp sequenced), which confirmed the presence of the 3' UTR SNP  
120 rs33183533 and the downstream SNP rs33182327, with no other sequence variants in *Pycard* exons,  
121 introns, or flanking regions. The 3' UTR SNP is 3 bp downstream from the stop codon, and this region is  
122 perfectly conserved in rats, which have the DBA/2 allele. Thus, the DBA/2 allele is likely the ancestral  
123 mouse allele, but this region it is not perfectly conserved in rabbits or primates (Fig. 1E).

#### 124 **DBA/2 vs. AKR BMDM have higher *Pycard* expression and form more ASC specks**

125 Real-time quantitative PCR analysis showed that *Pycard* mRNA is expressed at ~2-3-fold higher levels in  
126 DBA/2 BMDM relative to AKR BMDM in several independent experiments (Fig. 2A), in agreement with  
127 our prior cis-eQTL data. LPS priming had no effect on *Pycard* mRNA levels or the observed strain  
128 difference (Fig. 2A). Western blotting showed 1.5-fold higher levels of the protein product of *Pycard*,  
129 ASC, in DBA/2 vs. AKR BMDM (Fig. 2B,  $p < 0.01$ ). When inflammasome activation is triggered, ASC  
130 assembles into higher-order protein complexes termed "ASC specks". Immunostaining for ASC in  
131 untreated BMDM showed an expected diffuse cytosolic distribution in both strains (Fig. 2C). When  
132 inflammasomes were primed and activated by treatment with LPS (4 h) and ATP (30 min), more ASC  
133 speck puncta were observed in DBA/2 vs. AKR BMDM (Fig. 2C). The ASC specks in both strains appeared  
134 similar in size and shape, and displayed characteristic perinuclear localization. In a separate experiment,  
135 automated image analysis revealed that, after LPS and ATP treatment, 54 AKR BMDM had specks while  
136 8664 did not (0.6% speck positive), and 850 DBA/2 BMDM had specks while 2357 did not (26.5% speck  
137 positive,  $p < 0.0001$  by Fisher's exact test).

#### 138 ***Pycard* mRNA half-life is shorter in AKR vs. DBA/2 BMDM**

139 We hypothesized that the *Pycard* 3' UTR SNP could influence *Pycard* mRNA turnover. To determine if  
140 *Pycard* mRNA turnover was different between DBA/2 and AKR BMDM, an actinomycin D time course  
141 study was performed. The study revealed that *Pycard* mRNA had a longer half-life ( $t_{1/2}$ ) in DBA/2 BMDM  
142 than in AKR BMDM (1.64 vs. 1.16 hours, respectively, Fig. 3A), with 2-way ANOVA showing significant  
143 time ( $p < 0.0001$ ), strain ( $p = 0.031$ ), and interaction effects ( $p = 0.002$ ). Similar results were obtained in an  
144 independent experiment. To test for differences in *Pycard* transcription rate, a nuclear run-on  
145 experiment was performed, which revealed no significant difference between AKR and DBA/2 BMDM

146 (Fig. 3B). The secondary structure of a 30 nucleotide sequence of *Pycard* mRNA encompassing the  
147 3'UTR SNP was predicted using the RNAfold WebServer (<http://rna.tbi.univie.ac.at/cgi-bin/RNAfold.cgi>).  
148 There is a marked difference in predicted mRNA secondary structure near the SNP, where the AKR allele  
149 has a longer stem without a loop after the SNP, and the DBA/2 allele forms a shorter stem followed by a  
150 loop (Fig. 3C). To determine potential allele-specific miRNA target sites, we searched the miRDB (11) for  
151 miRNAs predicted to bind to 150 nucleotide segments of *Pycard* mRNA centered on the 3'UTR SNP.  
152 Although we identified the target sequence CCAGCUA, 8 nt after the SNP, which is predicted to bind to  
153 murine miR-7688-5p, miR-7085-3p, and miR7669-3p, no allele-specific miRNA targets were identified.  
154 To determine if the 3'UTR SNP altered mRNA splicing or isoform expression, we performed RNAseq on  
155 RNA isolated from AKR and DBA/2 BMDM. Assessment of the mapped reads using the IGV browser (12)  
156 revealed that both strains express the identical 3-exon isoform (Fig. 3D), although both the 5' and the  
157 3'UTRs are shorter than the canonical major transcript isoform (*Pycard*-201, ENSMUST00000033056.4)

### 158 **CRISPR/Cas9 editing of *Pycard* in embryonic stem cells**

159 To confirm the role of the *Pycard* 3'UTR SNP on *Pycard* expression and IL-1 $\beta$  release after inflammasome  
160 activation, CRISPR/Cas9 homology directed repair (HDR) gene editing was employed to change the  
161 DBA/2 allele (T on coding strand) to the AKR allele (A on coding strand) in the DBA/2J mouse embryonic  
162 stem (ES) cell line AC173/GrsrJ. We were able to enrich for HDR editing vs. non-homologous end joining  
163 (NHEJ) by using: 1) selection via an HDR-dependent GFP-stop codon reporter; 2) a NHEJ inhibitor; and, 3)  
164 cell cycle synchronization (Fig. 4A). The *Pycard* guide RNA target sequence (on the antisense strand)  
165 contained the SNP (Fig. 4B), so that successful HDR would eliminate the perfect match with the single  
166 guide RNA (sgRNA) and limit re-cutting of the edited allele. After co-transfection with sgRNAs and single  
167 strand donor DNAs to correct the GFP stop codon and edit the *Pycard* SNP, we sorted GFP<sup>+</sup> cells for  
168 clonal growth. We screened 49 colonies by allele specific PCR (Fig. 4B, C) and Sanger sequencing  
169 (Fig.4D). We obtained five colonies (10.2%) homozygous for the AKR allele, and three of these colonies  
170 (H2, H5, and H35) were expanded for functional testing.

### 171 ***Pycard* 3'UTR SNP confirmed as a causal modifier via ES cell derived macrophage (ESDM) functional** 172 **tests**

173 Macrophage-directed differentiation was performed on the three homozygous *Pycard* edited cell lines  
174 and their parental clonally derived DBA/2 ES cell line as previously described, and confirmed by  
175 acetylated LDL uptake (5). After LPS and ATP treatment the DBA/2 ESDM released about 2-fold more IL-  
176 1 $\beta$  vs. the three independent *Pycard* edited ESDM lines ( $p < 0.05$  or  $< 0.01$ , Fig. 5A). qPCR demonstrated  
177 that *Pycard* mRNA was ~3-fold higher in DBA/2 ESDM relative to *Pycard* edited ESDM lines ( $p = 0.014$ , Fig.  
178 5B). This difference in *Pycard* mRNA was associated with mRNA  $t_{1/2}$  of 6.37 vs. 4.56 hours in DBA/2  
179 ESDM vs. *Pycard* edited ESDM, respectively (Fig. 5C). Western blot analysis showed greater  
180 heterogeneity in the levels of ASC protein among the three *Pycard* edited ESDM lines; however, all three  
181 edited ESDM lines had reduced ASC protein vs. DBA/2 ESDM ( $p < 0.05$  or  $p < 0.001$ , Fig. 5D). These results  
182 confirm that the *Pycard* 3'UTR SNP is a causal variant that alters *Pycard* mRNA turnover, ASC levels, and  
183 IL-1 $\beta$  release. Of interest, compared to the BMDM, the absolute values of IL-1 $\beta$  secretion and the  
184 *Pycard* mRNA  $t_{1/2}$  were different in the ESDM, suggesting these macrophages may be less mature than  
185 BMDM.

### 186 **Discussion**

187 QTL mapping of macrophage IL-1 $\beta$  secretion performed on an AKRxDBA/2 F<sub>4</sub> population identified an  
188 approximate 3.5 Mb locus on distal chromosome 7, which we named *Irm3*. *Pycard* resides in *Irm3* and  
189 was recognized as a very strong candidate gene because its protein product, ASC, is an inflammasome  
190 adaptor protein, and *Pycard* had a strong cis-eQTL in a prior study (2). DBA/2 vs. AKR BMDM were  
191 shown to express *Pycard* and ASC at higher levels and assemble more ASC specks upon LPS and ATP  
192 stimulation. The lone SNP in the *Pycard* gene sequence (rs33183533) between AKR and DBA/2 mice,  
193 located in the 3'UTR, was unequivocally verified as a significant modulator of macrophage IL-1 $\beta$   
194 secretion and *Pycard* expression using CRISPR/Cas9 gene editing.

195 Another group previously identified the inflammatory response modulator 1 (*Irm1*) QTL on the distal  
196 end of mouse chromosome 7, which was associated with both IL-1 $\beta$  release from *ex vivo* stimulated  
197 blood leukocytes and *in vivo* leukocyte Biogel infiltration. This QTL was mapped by intercrossing  
198 incompletely inbred high and low responder strains derived from an 8-strain intercross followed by  
199 selective breeding (8). The *Irm1* 1-LOD confidence interval for leukocyte IL-1 $\beta$  release extends from  
200 130.75-144.75 Mb, which encompasses the *Irm3* QTL (134.80-138.45 Mb) discovered in the current  
201 study. Therefore, it is possible that *Irm3* represents a fine-mapping of a candidate gene in the *Irm1*  
202 locus, which is plausible considering we started with inbred strains, created an F<sub>4</sub> versus an F<sub>2</sub> cross, and  
203 used a denser SNP panel. Although these investigators never identified the gene responsible for *Irm1*,  
204 they ruled out *Pycard* as the causal gene for *Irm1* due to equal distribution of the 3'UTR SNP we  
205 evaluated (rs33183533) and another SNP in the first intron of the *Pycard* gene (rs51540238) among the  
206 high and low responder parental strains used in their study (8). However, their study did not examine  
207 the *Pycard* 3'UTR SNP genotype effect on IL-1 $\beta$  produced in the F<sub>2</sub> mice, and thus it is possible that the  
208 *Irm1* QTL is indeed due to the *Pycard* 3'UTR SNP due to the selection and success of specific breeders  
209 within the incompletely inbred parental high and low responder strains. In addition, *Pycard* mRNA and  
210 ASC expression levels in the F<sub>2</sub> mice were not reported in their study. As with any QTL study, it is also  
211 possible that there are additional genes that modulate IL-1 $\beta$  secretion at the distal end of chromosome  
212 7, and another gene is the primary modulator for the strains used in their study. Additional mouse QTLs  
213 that overlap *Irm3* include *Lsq-1*, a QTL for hindlimb ischemia (13), and *Civq1*, a QTL for infarct volume  
214 following ischemic stroke (14). Neither study postulates a role for *Pycard* in these phenotypes.

215 Human GWAS studies revealed a SNP near *Pycard* that is associated with bronchodilator response in  
216 asthma, although this association does not meet the commonly used threshold ( $<5 \times 10^{-8}$ ) for genome-  
217 wide significance (15). The dbSNP database lists only two common human SNPs within the *PYCARD*  
218 gene, rs115908198 located in the 3'UTR and rs73532217 located in the first intron. These two SNPs are  
219 only common ( $>1\%$  minor allele frequency) in African populations with minor allele frequencies of  $\sim 7\%$   
220 and  $\sim 2\%$ , respectively. However, neither of these SNPs have been studied mechanistically to determine  
221 effects on *PYCARD* expression. The human GTEx portal (Release V8) study of gene expression in many  
222 postmortem human tissues identifies 80 distinct cis-eQTL SNPs near the *PYCARD* gene associated with  
223 *PYCARD* mRNA expression at  $p < 5 \times 10^{-8}$ , including the intronic SNP rs73532217. Due to linkage  
224 disequilibrium, the co-inheritance of nearby variants from ancestral chromosomes, it is likely that only  
225 one or a few of these cis-eQTL SNPs are true regulatory SNPs that alter mRNA production or turnover,  
226 which must be confirmed by mechanistic investigations such as those performed in the current study.

227 Searching the human GWAS catalog (<https://www.ebi.ac.uk/gwas/home>) for “interleukin-1 beta  
228 measurement” in January, 2021 yielded four studies; however, three of these found no common SNPs

229 associated with plasma/serum IL-1 $\beta$  at genome-wide significance, albeit these studies did identify SNPs  
230 associated with other cytokines (16–18). The single study that identified common SNPs associated with  
231 plasma IL-1 $\beta$  found two independent SNPs on chromosome 6, near the HLA locus, associated with IL-1 $\beta$   
232 levels (19). However, we suspect that human GWAS studies for IL-1 $\beta$  may be susceptible to false  
233 negative findings, as IL-1 $\beta$  levels have a large environmental component due to its response to infection  
234 or inflammation. Therefore, mouse studies may be useful to identify genes, pathways, and mechanisms  
235 that regulate IL-1 $\beta$  release after inflammasome activation, which would be difficult to perform in  
236 humans. However, performing *in vitro* human genetic studies with a large panel of human induced  
237 pluripotent stem cells differentiated into macrophages or dendritic cells (20) might be an excellent  
238 alternative to identify common human genetic variants associated with inflammasome  
239 priming/activation and IL-1 $\beta$  release.

240 We found that the *Pycard* 3'UTR SNP led to different predicted mRNA secondary structure without  
241 altering the transcript isoform expressed; and, we identified three mouse miRNAs with target sequences  
242 8 nt downstream of the 3'UTR SNP. Additional studies would be required to determine if the different  
243 structures of AKR and DBA/2 *Pycard* mRNAs influence the binding of miRNAs or putative RNA-binding  
244 proteins that might alter transcript turnover.

## 245 **Materials and Methods**

### 246 *Generation and genotyping of AKRxDBA/2 F<sub>4</sub> mice.*

247 All animal studies were approved by the Cleveland Clinic Institutional Animal Care and Use Committee.  
248 Parental wild type male AKR/J and female DBA/2J mice, obtained from JAX (# 648 and 671), were  
249 crossed to create the F<sub>1</sub> generation, fixing the Y chromosome from the AKR strain. Two breeding pairs of  
250 F<sub>1</sub> mice were bred to generate F<sub>2</sub> mice, and two breeding pairs of F<sub>2</sub> mice were used to generate F<sub>3</sub> mice.  
251 Six breeding pairs of F<sub>3</sub> mice were used to generate the 122 F<sub>4</sub> mice, which consisted of 70 males and 52  
252 females. Healthy F<sub>4</sub> mice were sacrificed at 8-10 weeks of age. Ear tissue was collected from each  
253 mouse and digested overnight at 55°C in lysis buffer containing 20mg/mL proteinase K. DNA was  
254 ethanol precipitated and resuspended in 10 mM Tris 1 mM EDTA (pH=8). Femurs were promptly flushed  
255 after sacrifice, and resultant bone marrow cells were washed, aliquoted, and cryopreserved. Cells were  
256 thawed and differentiated into macrophages at the time of experimentation, as described below. F<sub>4</sub>  
257 mice were genotyped as described previously (5). Briefly, the GeneSeek MegaMUGA SNP array was  
258 used, and filtering for call frequency and strain polymorphism using parental and F<sub>1</sub> DNA yielded 16,975  
259 informative SNPs that were used for QTL analysis. All marker locations are based on NCBI Mouse  
260 Genome Build 37.

### 261 *Bone marrow-derived macrophages*

262 Cryopreserved bone marrow cells were resuspended and plated in macrophage growth medium  
263 (DMEM, 10% FBS, 20% L-cell conditioned media as a source of Macrophage Colony Stimulating Factor).  
264 Media was renewed twice per week. Cells were used for experiments 11 to 14 days after plating, when  
265 the cells were confluent and fully differentiated into BMDM. 3 of the 122 F<sub>4</sub> frozen bone marrow cells  
266 did not generate macrophages yielding 119 samples assessed below.

### 267 *IL-1 $\beta$ release assay*

268 BMDM or ESDM were primed with 1 $\mu$ g/mL LPS from Escherichia coli O55:B5 (Sigma, L6529) for 4 hours  
269 at 37°C and subsequently treated with 5mM adenosine triphosphate (ATP) (Sigma; A2383) for 30  
270 minutes at 37°C. Media were collected and briefly centrifuged to pellet any cellular debris and the  
271 resultant supernatant was collected. IL-1 $\beta$  levels were measured via a mouse IL-1 $\beta$  ELISA assay  
272 according to the manufacturer's instructions (R&D Systems, MLB00C). Released IL-1 $\beta$  levels were  
273 normalized to cellular protein, as determined by the bicinchoninic acid protein assay (ThermoFisher,  
274 23227) of total cell lysates prepared by incubation at 37°C for  $\geq$  4 h in 0.2 N NaOH, 0.2% SDS.

#### 275 *Quantitative Trait Locus (QTL) mapping of macrophage IL-1 $\beta$ release*

276 QTL mapping of log<sub>10</sub> IL-1 $\beta$  released from 119 AKR x DBA/2 F4 BMDM was performed using R/qtl  
277 software (21). The "scanone" function was utilized using Haley-Knott regression by specifying the  
278 "method" argument as "hk". False discovery rates (FDRs) were estimated via permutation analysis,  
279 using 10,000 permutations by specifying the "n.perm" argument in the "scanone" function. QTL  
280 credible intervals were determined using the Bayesian credible interval ("bayesint") function in R/qtl,  
281 with the "prob" argument set at 0.95. QTL mapping for *Irm4-6* was performed using the genotypes from  
282 the most strongly associated *Irm3* marker as an additive covariate ("addcovar") in the "scanone"  
283 function of R/qtl, and again subjected to 10,000 permutation analyses to determine FDRs. Loci that  
284 reached significance were designated *Irm4-6* based on their occurrence scanning left to right across the  
285 genome. To aid in prioritizing candidate genes, a custom R function termed "flank\_LOD" was written  
286 ([https://github.com/BrianRitchey/qtl/blob/master/flank\\_LOD.R](https://github.com/BrianRitchey/qtl/blob/master/flank_LOD.R)). "flank\_LOD" utilizes the  
287 "find.flanking" function in R/qtl and returns the LOD score of the nearest flanking marker for a given  
288 candidate gene position based on "scanone" output data.

#### 289 *Pycard mRNA expression assay*

290 RNA was extracted from BMDM or ESDM by scrapping cells in QIAzol reagent and homogenization by 5 -  
291 10 passages through a 27 gauge syringe with subsequent phenol/chloroform extraction. RNA was  
292 purified using the miRNeasy Mini Kit (Qiagen, 217004) with on-column DNA digestion according to  
293 manufacturer's instructions. cDNA was generated using SuperScript VILO Master Mix (ThermoFisher,  
294 11755050) or IScript cDNA Synthesis Kit (BioRad, 1708891). mRNA levels were determined via TaqMan  
295 qPCR assays for mouse *Pycard* (ThermoFisher, 4331182, Assay ID: Mm00445747\_g1), with *Actb*  
296 (4448484, Assay ID: Mm02619580\_g1) serving as an internal control. Samples were run for 40 cycles on  
297 an Applied Biosystems StepOnePlus Real-Time PCR System using the comparative Ct method. Resultant  
298 data were analyzed using the 2 <sup>$\Delta\Delta$ Ct</sup> method relative to the average AKR  $\Delta$ Ct for BMDM, and the average  
299 DBA/2 ESDM  $\Delta$ Ct for ESDM. In some experiments, *Pycard* mRNA turnover was assessed by treating cells  
300 with 10  $\mu$ g/mL Actinomycin D (Sigma, A1410) at various time points before cells were harvested.

#### 301 *Nuclear Run-on*

302 Previously published methods were followed (22, 23). AKR and DBA/2 BMDM were first primed with 1  
303  $\mu$ g/mL LPS for 4 hours. Cells were collected into strain-specific pools, counted on a hemocytometer, and  
304 lysed in NP-40 lysis buffer to obtain nuclei. In vitro RNA synthesis with biotin-16-UTP was performed  
305 using 50 million nuclei per reaction, with triplicate concurrent reactions for each strain. Reactions were  
306 incubated at 30°C for 30 minutes, and RNA was extracted and purified using the miRNeasy Mini Kit.  
307 Newly synthesized transcripts were selected for biotin-16-UTP incorporation using streptavidin coated  
308 magnetic beads (ThermoFisher, Dynabeads M-280). Beads were extracted using QIAzol reagent, with



309 subsequent phenol/chloroform extraction, and RNA was ultimately isopropanol precipitated with  
310 glycogen added as a carrier. cDNA was generated using SuperScript VILO Master Mix, and RNA levels  
311 were determined via TaqMan qPCR assays for mouse *Pycard* (ThermoFisher, 4441114, Assay ID:  
312 AJMSHN7 ), with *Actb* (ThermoFisher, 4448484, Assay ID: Mm02619580\_g1) serving as an internal  
313 control. A custom TaqMan assay was designed for *Pycard*, with primers spanning an intron-exon  
314 boundary. The specific *Actb* TaqMan assay was selected because primers were within a single exon.  
315 These assays comply with the primer design guidelines for nascent transcript quantification as  
316 previously described (22).

#### 317 *ASC western blot assay*

318 Proteins were extracted from BMDM or ESDM in triplicate with RIPA buffer (Pierce, 89900,) as  
319 previously described (5). 15 to 50  $\mu$ g of each cell lysate was mixed with SDS sample buffer and incubated  
320 for 8 min at 95°C then immediately cooled on ice for 8 min. Proteins were separated by SDS-PAGE  
321 (ThermoFisher, XP04200BOX) for 2 hours at 110V, and then transferred to a PDVF membrane. After  
322 incubating with Casein Blocker in TBS (ThermoFisher, 37532) for 1 hour at room temperature, the  
323 membrane was incubated overnight at 4°C with primary rabbit ASC antibody (Cell Signaling, 67824)  
324 1:500 in blocking buffer. After washing with PBS-0.05% Tween20, the membrane was probed with HRP-  
325 conjugated secondary antibody (goat anti-rabbit) 1:20,000 in blocking buffer for 1 hour at room  
326 temperature. The bands were visualized by HRP chemiluminescence detection Reagent (Millipore,  
327 WBKLS0500). The membrane was re-probed with HRP-conjugated anti  $\beta$ -actin (Santa Cruz Biotech, sc-  
328 47778) 1:20,000 in blocking buffer for 1 hour at room temperature and visualized in the same way.  
329 Densitometric analysis of bands was performed using ImageJ software.

#### 330 *ASC speck imaging and quantification*

331 BMDM grown in 24 well plates were fixed in ethanol and blocked in 1% BSA. Immunostaining against  
332 ASC was performed using ASC (N-15) antibody (Santa Cruz Biotechnology; sc-22514-R) at 10  $\mu$ g/mL for  
333 one hour at room temperature. Alexa Fluor 568 anti-rabbit (ThermoFisher; A-11011) was then  
334 incubated at 2  $\mu$ g/mL for one hour at room temperature. DAPI (Sigma; D9542) staining (300 nM) was  
335 performed for five minutes at room temperature. Images were captured using the Cytation 3 Cell  
336 Imaging Multi-Mode Reader (Biotek) using a 20x objective lens. For one experiment, automated images  
337 were captured using the Cytation 3 instrument from triplicate LPS + ATP treated BMDM wells per strain  
338 using a 12 x 10 grid in each well (120 total images per well). Nuclei and ASC specks were counted using  
339 the cellular analysis feature in Gen5 software (Biotek). Nuclei and speck counts were compared in AKR  
340 vs. DBA/2 BMDM by Fisher's exact test contingency table analysis.

#### 341 *RNA sequencing*

342 Total RNA was prepared from AKR and DBA/2 BMDM using miRNeasy Mini Kit (Qiagen; # ID 217004)  
343 with on-column DNA digestion according to manufacturer's instructions. RNA integrity and RNAseq was  
344 performed by the University of Chicago Genomics Core. 30 million paired end reads were obtained using  
345 the Illumina NovaSeq 6000 with library preparation using the oligo dT directional method. Fasta files  
346 were preprocessed, aligned and quantified using the nf-core/rnaseq pipeline version 1.4.2, which is part  
347 of nf-core framework for community-curated bioinformatics pipelines (24). Specifically, reads were  
348 aligned using the STAR aligner version 2.6.1d with the Gencode M25 transcriptome and GRCm38  
349 primary assembly genome and all default values of the pipeline were used except read trimming was not

350 performed before alignment. The BAM and BAM index files were viewed and Sashimi plots prepared  
351 using the Integrative Genomics Viewer (IGV) browser (12).

### 352 *Cell lines and cell culture*

353 Puromycin-resistant MEF feeder cells (Cell Biolabs, CBA-312) and neomycin-resistant MEF feeder cells  
354 (Cell Biolabs, CBA-311) were cultured in DMEM high glucose supplemented with 10% fetal bovine serum  
355 and 1% PenStrep at 37°C, then inactivated with 10 µg/ml mitomycin C (Sigma, M4287) for 2 hours for  
356 mouse embryonic stem cell culture, as previously described (5). DBA/2J mouse ES cell line AC173/GrsrJ  
357 (JAX, 000671C02), was cultured on 0.1% gelatin coated plates with mitomycin C inactivated MEFs, in ES  
358 culture medium (DMEM high glucose with 15% fetal bovine serum, 1% MEM Non-Essential Amino Acids,  
359 1% PenStrep, 0.1 mM 2-mercaptoethanol, 10<sup>3</sup> unit/ml leukemia inhibitory factor (Millipore Sigma,  
360 ESG1107), 1 µM PD0325901 (Sigma, PZ0162) and 3 µM CHIR99021 (Sigma, 361571)), at 37°C. All cell  
361 lines were detached with trypsin and frozen with 80% ES culture medium supplemented with 10%  
362 DMSO and an additional 10% FBS.

363

### 364 *Gene editing by homology directed repair (HDR)*

365 CRISPR/Cas9 HDR was employed in DBA/2 ES to make a single base pair change in the *Pycard* 3'UTR SNP  
366 from the DBA/2 allele to the AKR allele. In order to enhance the low frequency of HDR, multiple  
367 strategies were employed, including reporter-dependent co-selection, non-homologous end joining  
368 (NHEJ) inhibition, and cell cycle control (Fig. 4 A, B). 5 µg Cas9 expression plasmid pSpCas9(BB)-2A-Puro  
369 (Addgene, PX459) was stably transfected into 8x10<sup>5</sup> DBA/2 ES cells via electroporation, using a Lonza  
370 Amaxa nucleofactor II with program A-24 and mouse ES cell nucleofactor kit (Amaxa, VAPH-1001).  
371 Transfected cells were plated in 2 mg/ml puromycin in ES culture medium on the puromycin resistant  
372 MEFs in P100 tissue culture dishes. One week later, the medium was replaced with regular ES culture  
373 medium. 3 to 7 days later individual colonies were picked and expanded and western blot was used to  
374 confirm Cas9 protein expression (Diagenode, C15200203). Cas9 expression in a high expressing line was  
375 confirmed by immunohistochemistry (5).

376 To create a selectable HDR reporter, we used site-directed mutagenesis of a GFP expression plasmid  
377 (MSCV-miRE-shRNA IFT88-PGK-neo-IRES-GFP plasmid, Addgene # 73576), and substituted a single G for  
378 a C to introduce an in frame stop codon (TAG) in place of a tyrosine codon (TAC) in the initial region of  
379 the GFP coding sequence and simultaneously generate a new PAM sequence (AGG) from the original  
380 sequence (ACG). Two oligos (F: GCGATGCCACCTAGGGCAAGCTGACCCTG and R:  
381 CAGGGTCAGCTTGCCCTAGGTGGCATCGC) were used with the QuikChange II mutagenesis kit (Agilent,  
382 200523). We confirmed that this mutation (GFPstop) extinguished GFP expression compared to the  
383 parent plasmid by transient transfection. 2 µg of the GFPstop expression plasmid was stably transfected  
384 into the Cas9 stably transfected DBA/2 ES cell line as described above, followed by selection in growth  
385 media containing 900 µg/ml G418. Colonies were expanded and stable transfection confirmed by PCR  
386 of genomic DNA using GFP specific primers (F: ATAAGGCCGGTGTGCGTTTGTCTA; R:  
387 CGCGTTCTCGTTGGGGTCTTTG).

388

389 sgRNAs were designed to target Cas9 nuclease to the GFPstop (GGGCGAGGGCGAUGCCACCU) and the  
390 *Pycard* 3' UTR SNP (AGAUACCUCAGCUCUGCUCC) using ZiFit software (25) and purchased from Synthego  
391 with their chemical modification to increase stability. To perform HDR gene editing we prepared two  
392 ssDNA donor templates by PCR and single strand degradation as described below. The GFP donor  
393 repairs the created stop codon and removes the PAM sequence utilized by the GFP sgRNA, thus HDR

394 would simultaneously generate GFP+ cells that cannot be recut by Cas9 nuclease. The GFP donor PCR  
395 primers 5' phosphorylated-CGCGCTTCTCGTTGGGGTCTTTG (the non-PAM strand) and  
396 ATAAGGCCGGTGTGCGTTTGTCTA (PAM strand) generated an 1188 bp dsDNA product using the non-  
397 mutated GFP expression vector as a template. The Guide-it Long ssDNA Production System (Takara Bio,  
398 632644,) was used to degrade the 5' phosphorylated strand to generate the ssDNA PAM-strand GFP  
399 donor. The *Pycard* donor creates the AKR allele at the 3' UTR SNP and changes the sgRNA target  
400 sequence such that HDR would simultaneously generate the AKR allele that cannot be recut by Cas9  
401 nuclease. The *Pycard* donor PCR primers 5' phosphorylated -TGTGTCCCCTTGTTCTGCTACCC (non-PAM  
402 strand) and TTTCTAAGCCCCATTGCCTGTTTT (PAM strand) generated an 1144 bp dsDNA product using  
403 AKR mouse genomic DNA as a template. The ssDNA PAM-strand *Pycard* donor was generated as  
404 described above.

405  
406 Electroporation for HDR was performed as described above on  $2 \times 10^6$  Cas9+/GFPstop stably transfected  
407 ES cells using 100 pmol each of the GFP and *Pycard* template donors and 2  $\mu$ g of each sgRNA. In order  
408 to increase HDR we used cell cycle control, as previously described (26), by treatment of 70% confluent  
409 ES cells for 3 hours with 5  $\mu$ g/ml aphidicolin prior to the electroporation and 8 hours treatment with 300  
410 ng/ml nocodazole after the electroporation. We also inhibited NHEJ (27) by adding 0.1  $\mu$ M brefeldin A1  
411 and 5mM L755507 for the first 16 hours after electroporation and then replacing with ES growth  
412 medium. 96 hours after electroporation, the transfected cells were detached for fluorescent activated  
413 cell sorting (FACS) to collect the GFP+ cells competent for HDR. GFP+ cells were plated at low density on  
414 inactivated MEFs for 10 days and individual colonies were picked and expanded.

415  
416 55 clonally derived GFP+ cell lines were subjected to *Pycard* genotyping by allele-specific PCR. Genomic  
417 DNA was extracted from each cell line and used as a PCR template in separate reaction with AKR allele-  
418 specific primers (F: AACAGCCCCACCCCAAAATCCAC; R: CCTGGAGCAGAGCTGAGGA) and DBA/2 allele-  
419 specific primer (F: AACAGCCCCACCCCAAAATCCAC; R: CCTGGAGCAGAGCTGAGGT), which only differed  
420 from each other in the 3' terminal nucleotide on the R primer (Fig. 4B). Genomic DNA from AKR and  
421 DBA/2 mice was used as positive and negative controls for the respective allele-specific PCR reactions.  
422 The allele specific PCR reactions can also yield a false negative if an indel is introduced by NHEJ such that  
423 neither primer pair would work. Thus, samples yielding product only with the DBA/2 primers can be  
424 derived from unedited wild type DBA/2 (WT) WT/WT alleles, or WT/NHEJ alleles (Fig. 4C). Likewise, for  
425 samples yielding product only with the AKR primer set can be derived from homozygous AKR alleles  
426 derived by HDR, HDR/HDR alleles, or HDR/NHEJ alleles. To distinguish HDR/HDR from HDR/NHEJ  
427 genotypes we performed a non-allele-specific PCR reaction (F: AACAGCCCCACCCCAAAATCCAC; R:  
428 GTGGCTTTCCTTGATTCT) for sequencing (Fig 4B). The PCR product was purified with ExoSAP-IT PCR  
429 Product Cleanup Reagent (ThermoFisher), and Sanger sequenced using the primer  
430 CATAACTTGGGTCTGTGG. If only one sequence was obtained corresponding to the HDR allele the  
431 genotype is homozygous HDR/HDR, i.e. mutated to the AKR allele at the *Pycard* 3' UTR SNP (Fig. 4D). In  
432 subsequent functional studies, three independent homozygous (H) HDR/HDR *Pycard* edited cell lines  
433 were used, named H2, H5, and H35.

#### 434 435 *ESDM differentiation*

436 The macrophage differentiation protocol was adapted from previous publications (28, 29). Three  
437 homozygous *Pycard* edited cell lines and their parental Cas9+/GFPstop stably transfected DBA/2 ES cell  
438 line (DBA/2) were cultured on inactivated MEFs as described above. These cell lines were passaged  
439 without inactivated MEFs for two generations from low density to 80% confluence to decrease MEF  
440 contamination. To eliminate any possible residual MEFs, detached cells were bound to gelatin coated

441 tissue culture plates in ES culture medium at 37°C for 30 minutes, such that MEFs stuck to the plate and  
442 ES cells remained in the supernatant.  $6 \times 10^5$  ES cells from each cell line were resuspended in macrophage  
443 differentiation medium (MDM), which consists of DMEM high glucose, 15% FBS, 1% PenStrep, 1% MEM  
444 non-essential amino acids, 0.1 mM 2-mercaptoethanol, 3 ng/ml mouse IL-3 (R&D Systems) and 20% L-  
445 cell conditioned medium. These cells were cultured in petri dishes (low adherence) in a 37°C incubator  
446 while on a horizontal rocker at 1 cycle/3 seconds for 7 days to avoid attachment and aggregation of  
447 newly forming embryoid bodies. On day 8, the floating embryoid bodies were transferred to gelatin  
448 coated P-100 tissue culture plates in MDM. 5 days later, floating macrophage progenitor cells were  
449 harvested and filtered through a 30  $\mu$ m sterile filters (Sysmex, 04-004-2326) to remove any embryoid  
450 bodies, and plated on gelatin-coated tissue culture plates. This harvest of macrophage progenitors was  
451 repeated every other day. In order to determine the efficacy of differentiation into macrophages, we  
452 performed a Dil labeled acetylated low density lipoprotein (Dil-AcLDL) uptake 13 days after plating the  
453 macrophage progenitors. Cells were incubated with Dil-AcLDL for 30 minutes at 37°C and uptake was  
454 confirmed by fluorescent-microscopy as previously described (5). In addition, we compared ESDM with  
455 BMDM and found that they were similar by flow cytometry using antibodies against common mouse  
456 leukocyte markers: CD11b<sup>+</sup>, CD11c<sup>+</sup>, Ly6G<sup>-</sup>, and Ly6C<sup>lo</sup>. We also determined that undifferentiated DBA/2  
457 ES cells were CD11b<sup>-</sup> and CD11c<sup>-</sup>.

458

#### 459 *Bioinformatic analysis*

460 Genes in QTL intervals were determined by custom written R functions (“QTL\_gene” and  
461 “QTL\_summary”) which utilize publicly available BioMart data from Mouse Genome Build 37. A custom  
462 written R function (“pubmed\_count”), which utilize the rentrez package in R was used to determine the  
463 number of PubMed hits for Boolean searches of gene name and term of interest. Custom written R  
464 functions (“sanger\_AKRvDBA\_missense\_genes” and “missense\_for\_provean”) were used to determine  
465 the number of missense (non-synonymous) mutations between AKR/J and DBA/2J mice in QTLs, as  
466 documented by the Wellcome Trust Sanger Institute’s Query SNP webpage for NCBI m37  
467 ([https://www.sanger.ac.uk/sanger/Mouse\\_SnpViewer/rel-1211](https://www.sanger.ac.uk/sanger/Mouse_SnpViewer/rel-1211)). Custom written VBA subroutines  
468 (“Provean\_IDs” and “Navigate\_to\_PROVEAN”) were used to automate PROVEAN software  
469 ([http://provean.jcvi.org/seq\\_submit.php](http://provean.jcvi.org/seq_submit.php)) queries for predicted functional effects of missense mutations  
470 in each QTL, with rentrez functions utilized to retrieve dbSNP and protein sequence data. Ultimately,  
471 custom R code was used to generate output tables. Deleterious mutations were designated as defined  
472 by PROVEAN parameters (9). All custom written code can be found at  
473 <http://www.github.com/BrianRitchey/qtl>.

#### 474 **Author contributions**

475 Conceptualization: B.R., Q.H., J.D.S.; Data curation: B.R., J.D.S.; Formal Analysis: B.R., Q.H. J.B., J.D.S.;  
476 Funding acquisition: J.D.S.; Investigation: B.R., Q.H., J.H., J.B., J.D.S.; Methodology: B.R., Q.H., J.B., J.D.S.;  
477 Project administration: J.D.S.; Software: B.R., J.B.; Supervision: J.D.S.; Validation: J.D.S.; Writing – original  
478 draft: B.R., Q.H., J.D.S.; Writing – review & editing: B.R., Q.H., J.H., J.B., J.D.S.

#### 479 **Acknowledgments**

480 This work was funded by grant P01 HL029582 (J.D.S.) and by the Geoffrey Gund Endowed Chair for  
481 Cardiovascular Research (J.D.S.). The authors declare no competing financial interests.

482

483 **References**

- 484 1. Smith, J. D., J. M. Bhasin, J. Baglione, M. Settle, Y. Xu, and J. Barnard. 2006. Atherosclerosis  
485 susceptibility loci identified from a strain intercross of apolipoprotein E-deficient mice via a high-  
486 density genome scan. *Arterioscler. Thromb. Vasc. Biol.* **26**: 597–603.
- 487 2. Hsu, J., and J. D. Smith. 2013. Genetic-genomic replication to identify candidate mouse atherosclerosis  
488 modifier genes. *J. Am. Heart Assoc.* **2**: 1–15.
- 489 3. Han, J., P. Robinet, B. Ritchey, H. Andro, and J. D. Smith. 2019. Confirmation of Ath26 locus on  
490 chromosome 17 and identification of Cyp4f13 as an atherosclerosis modifying gene.  
491 *Atherosclerosis*. **286**: 71–78.
- 492 4. Nakashima, Y., A. S. Plump, E. W. Raines, J. L. Breslow, and R. Ross. 1994. ApoE-deficient mice develop  
493 lesions of all phases of atherosclerosis the arterial tree. *Arter. Thromb.* **14**: 133–140.
- 494 5. Hai, Q., B. Ritchey, P. Robinet, A. M. Alzayed, G. Brubaker, J. Zhang, and J. D. Smith. 2018. Quantitative  
495 Trait Locus Mapping of Macrophage Cholesterol Metabolism and CRISPR/Cas9 Editing Implicate  
496 an ACAT1 Truncation as a Causal Modifier Variant. *Arterioscler. Thromb. Vasc. Biol.* **38**.
- 497 6. Robinet, P., B. Ritchey, A. M. Alzayed, E. Schowscki, S. W. Lorkowski, and J. D. Smith. 2019. QTL  
498 analysis of macrophages from an AKR/JxDBA/2J intercross identified the Gpnmb gene as a  
499 modifier of lysosome function. *bioRxiv*. **10.1101**: 684118.
- 500 7. Ridker, P. M., B. M. Everett, T. Thuren, J. G. MacFadyen, W. H. Chang, C. Ballantyne, F. Fonseca, J.  
501 Nicolau, W. Koenig, S. D. Anker, J. J. P. Kastelein, J. H. Cornel, P. Pais, D. Pella, J. Genest, R.  
502 Cifkova, A. Lorenzatti, T. Forster, Z. Kobalava, L. V. Simiti, M. Flather, H. Shimokawa, H. Ogawa,  
503 M. Dellborg, P. R. F. Rossi, R. P. T. Troquay, P. Libby, R. J. Glynn, and C. Trial. 2017.  
504 Antiinflammatory Therapy with Canakinumab for Atherosclerotic Disease. *N. Engl. J. Med.* **377**:  
505 1119–1131.
- 506 8. Vorraro, F., A. Galvan, W. H. K. Cabrera, P. S. Carneiro, O. G. Ribeiro, M. De Franco, N. Starobinas, J. R.  
507 Jensen, M. Seman, T. A. Dragani, and O. C. M. Ibañez. 2010. Genetic Control of IL-1 $\beta$  Production  
508 and Inflammatory Response by the Mouse Irm1 Locus. *J. Immunol.* **185**: 1616–1621.
- 509 9. Choi, Y., and A. P. Chan. 2015. PROVEAN web server: A tool to predict the functional effect of amino  
510 acid substitutions and indels. *Bioinformatics*. **31**: 2745–2747.
- 511 10. Yalcin, B., D. J. Adams, J. Flint, and T. M. Keane. 2012. Next-generation sequencing of experimental  
512 mouse strains. *Mamm. Genome*. **23**: 490–498.
- 513 11. Wong, N., and X. Wang. 2015. miRDB: An online resource for microRNA target prediction and  
514 functional annotations. *Nucleic Acids Res.* **43**: D146–D152.
- 515 12. Robinson, J. T., H. Thorvaldsdóttir, W. Winckler, M. Guttman, E. S. Lander, G. Getz, and J. P. Mesirov.  
516 2011. Integrative genomics viewer. *Nat. Biotechnol.* **29**: 24–26.
- 517 13. Dokun, A. O., S. Keum, S. Hazarika, Y. Li, G. M. Lamonte, F. Wheeler, D. A. Marchuk, and B. H. Annex.  
518 2008. A quantitative trait locus (LSq-1) on mouse chromosome 7 is linked to the absence of tissue  
519 loss after surgical hindlimb ischemia. *Circulation*. **117**: 1207–1215.
- 520 14. Keum, S., and D. A. Marchuk. 2009. A locus mapping to mouse chromosome 7 determines infarct  
521 volume in a mouse model of ischemic stroke. *Circ. Cardiovasc. Genet.* **2**: 591–598.

- 522 15. Lutz, S. M., M. H. Cho, K. Young, C. P. Hersh, P. J. Castaldi, M. L. McDonald, E. Regan, M. Mattheisen,  
523 D. L. DeMeo, M. Parker, M. Foreman, B. J. Make, R. L. Jensen, R. Casaburi, D. A. Lomas, S. P.  
524 Bhatt, P. Bakke, A. Gulsvik, J. D. Crapo, T. H. Beaty, N. M. Laird, C. Lange, J. E. Hokanson, and E. K.  
525 Silverman. 2015. A genome-wide association study identifies risk loci for spirometric measures  
526 among smokers of European and African ancestry. *BMC Genet.* **16**: 1–11.
- 527 16. Matteini, A. M., J. Li, E. M. Lange, T. Tanaka, L. A. Lange, R. P. Tracy, Y. Wang, M. L. Biggs, D. E.  
528 Arking, M. D. Fallin, A. Chakravarti, B. M. Psaty, S. Bandinelli, L. Ferrucci, A. P. Reiner, and J. D.  
529 Walston. 2014. Novel gene variants predict serum levels of the cytokines IL-18 and IL-1ra in older  
530 adults. *Cytokine.* **65**: 10–16.
- 531 17. Ahola-Olli, A. V., P. Würtz, A. S. Havulinna, K. Aalto, N. Pitkänen, T. Lehtimäki, M. Kähönen, L. P.  
532 Lyytikäinen, E. Raitoharju, I. Seppälä, A. P. Sarin, S. Ripatti, A. Palotie, M. Perola, J. S. Viikari, S.  
533 Jalkanen, M. Maksimow, V. Salomaa, M. Salmi, J. Kettunen, and O. T. Raitakari. 2017. Genome-  
534 wide Association Study Identifies 27 Loci Influencing Concentrations of Circulating Cytokines and  
535 Growth Factors. *Am. J. Hum. Genet.* **100**: 40–50.
- 536 18. Offenbacher, S., Y. Jiao, S. J. Kim, J. Marchesan, K. L. Moss, L. Jing, K. Divaris, S. Bencharit, C. S. Agler,  
537 T. Morelli, S. Zhang, L. Sun, W. T. Seaman, D. Cowley, S. P. Barros, J. D. Beck, M. Munz, A. S.  
538 Schaefer, and K. E. North. 2018. GWAS for Interleukin-1 $\beta$  levels in gingival crevicular fluid  
539 identifies IL37 variants in periodontal inflammation. *Nat. Commun.* **9**.
- 540 19. Sliz, E., M. Kalaoja, A. Ahola-Olli, O. Raitakari, M. Perola, V. Salomaa, T. Lehtimäki, T. Karhu, H.  
541 Viinamäki, M. Salmi, K. Santalahti, S. Jalkanen, J. Jokelainen, S. Keinänen-Kiukaanniemi, M.  
542 Männikkö, K. H. Herzig, M. R. Järvelin, S. Sebert, and J. Kettunen. 2019. Genome-wide association  
543 study identifies seven novel loci associating with circulating cytokines and cell adhesion  
544 molecules in Finns. *J. Med. Genet.* **56**: 607–616.
- 545 20. Warren, C. R., and C. A. Cowan. 2018. Humanity in a Dish: Population Genetics with iPSCs. *Trends Cell*  
546 *Biol.* **28**: 46–57.
- 547 21. Broman, K. W., H. Wu, Ś. Sen, and G. A. Churchill. 2003. R/qtI: QTL mapping in experimental crosses.  
548 *Bioinformatics.* **19**: 889–890.
- 549 22. Roberts, T. C., J. R. Hart, M. U. Kaikkonen, M. S. Weinberg, P. K. Vogt, and K. V Morris. 2015.  
550 Quantification of nascent transcription by bromouridine immunocapture nuclear run-on RT-  
551 qPCR. *Nat. Protoc.* **10**: 1198–1211.
- 552 23. Patrone, G., F. Puppò, R. Cusano, M. Scaranari, I. Ceccherini, A. Puliti, and R. Ravazzolo. 2000.  
553 Nuclear run-on assay using biotin labeling, magnetic bead capture and analysis by fluorescence-  
554 based RT-PCR. *Biotechniques.* **29**: 1012–1017.
- 555 24. Ewels, P. A., A. Peltzer, S. Fillinger, H. Patel, J. Alneberg, A. Wilm, M. U. Garcia, P. Di Tommaso, and S.  
556 Nahnsen. 2020. The nf-core framework for community-curated bioinformatics pipelines. *Nat.*  
557 *Biotechnol.* **38**: 276–278.
- 558 25. Sander, J. D., M. L. Maeder, D. Reyon, D. F. Voytas, J. K. Joung, and D. Dobbs. 2010. ZiFIT (Zinc Finger  
559 Targeter): An updated zinc finger engineering tool. *Nucleic Acids Res.* **38**: 462–468.
- 560 26. Lin, S., B. T. Staahl, R. K. Alla, and J. A. Doudna. 2014. Enhanced homology-directed human genome  
561 engineering by controlled timing of CRISPR/Cas9 delivery. *Elife.* **3**: e04766.
- 562 27. Yu, C., Y. Liu, T. Ma, K. Liu, S. Xu, Y. Zhang, H. Liu, M. La Russa, M. Xie, S. Ding, and L. S. Qi. 2015.

563 Small molecules enhance crispr genome editing in pluripotent stem cells. *Cell Stem Cell*. **16**: 142–  
564 147.

565 28. Zhuang, L., J. D. Pound, J. J. L. P. Willems, a H. Taylor, L. M. Forrester, and C. D. Gregory. 2012. Pure  
566 populations of murine macrophages from cultured embryonic stem cells. Application to studies  
567 of chemotaxis and apoptotic cell clearance. *J. Immunol. Methods*. **385**: 1–14.

568 29. Yeung, A. T. Y., C. Hale, J. Xia, P. H. Tate, D. Goulding, J. A. Keane, S. Mukhopadhyay, and L. Forrester.  
569 2015. Conditional-ready mouse embryonic stem cell derived macrophages enable the study of  
570 essential genes in macrophage function. *Nat. Sci. reports*. **5**: 1–11.

#### 571 **Nonstandard Abbreviations**

572 ASC, apoptosis-associated speck-like protein containing a CARD; BMDM, bone marrow-derived  
573 macrophages; eQTL, expression quantitative trait locus; ES, embryonic stem; ESDM, embryonic stem  
574 cell-derived macrophages; HDR, homology directed repair; LOD, log<sub>10</sub> of the odds ratio; NHEJ, non-  
575 homologous end joining; QTL, quantitative trait locus; sgRNA, single guide RNA; SNP, single nucleotide  
576 polymorphism; UTR, untranslated region.

577

578 **Figures**

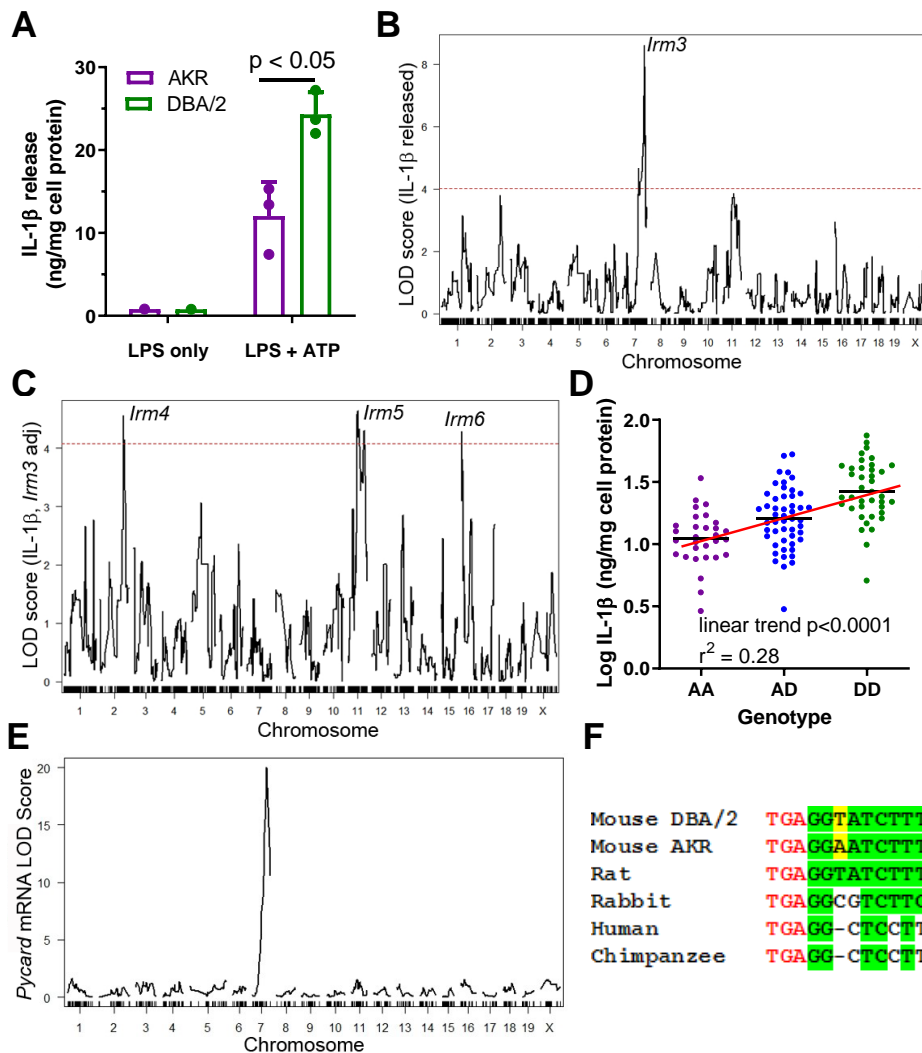

579

580 **Figure 1. Strain effect on IL-1 $\beta$  release associated with *Pycard* gene.** **A.** IL-1 $\beta$  released into conditioned  
581 media (normalized to cell protein) from AKR (magenta) or DBA/2 (green) BMDM after treatment with  
582 LPS (4 h, single well) only or LPS (4 h) + ATP (30 min, biological triplicates),  $p < 0.05$  where indicated by  
583 two-tailed t-test, mean and SD shown. Representative of several independent experiments. **B.** QTL  
584 mapping for IL-1 $\beta$  release from F<sub>4</sub> BMDMs, showing the prominent *Irm3* QTL peak on chromosome 7. **C.**  
585 QTL mapping for IL-1 $\beta$  release from F<sub>4</sub> BMDMs after adjusting for the effect of the *Irm3* QTL, showing  
586 *Irm4-6* QTLs on chromosomes 2, 11, and 16, respectively (dashed red line in **B** and **C** represents the  
587 genome-wide significance threshold). **D.** Log<sub>10</sub> IL-1 $\beta$  release from F<sub>4</sub> BMDMs by genotype at the  
588 strongest associated SNP at the *Irm3* peak (AA, AKR homozygotes; AD heterozygotes; DD, DBA/2  
589 homozygotes;  $p < 0.0001$  by ANOVA linear trend posttest). **E.** eQTL mapping for *Pycard* mRNA levels,  
590 showing the cis-eQTL peak mapping to chromosome 7 where the *Pycard* gene resides. **F.** *Pycard* gene  
591 sequence conservation at the stop codon (red text) and the immediate 3'UTR (conserved residues  
592 highlighted in green and the AKR-DBA/2 SNP in yellow).



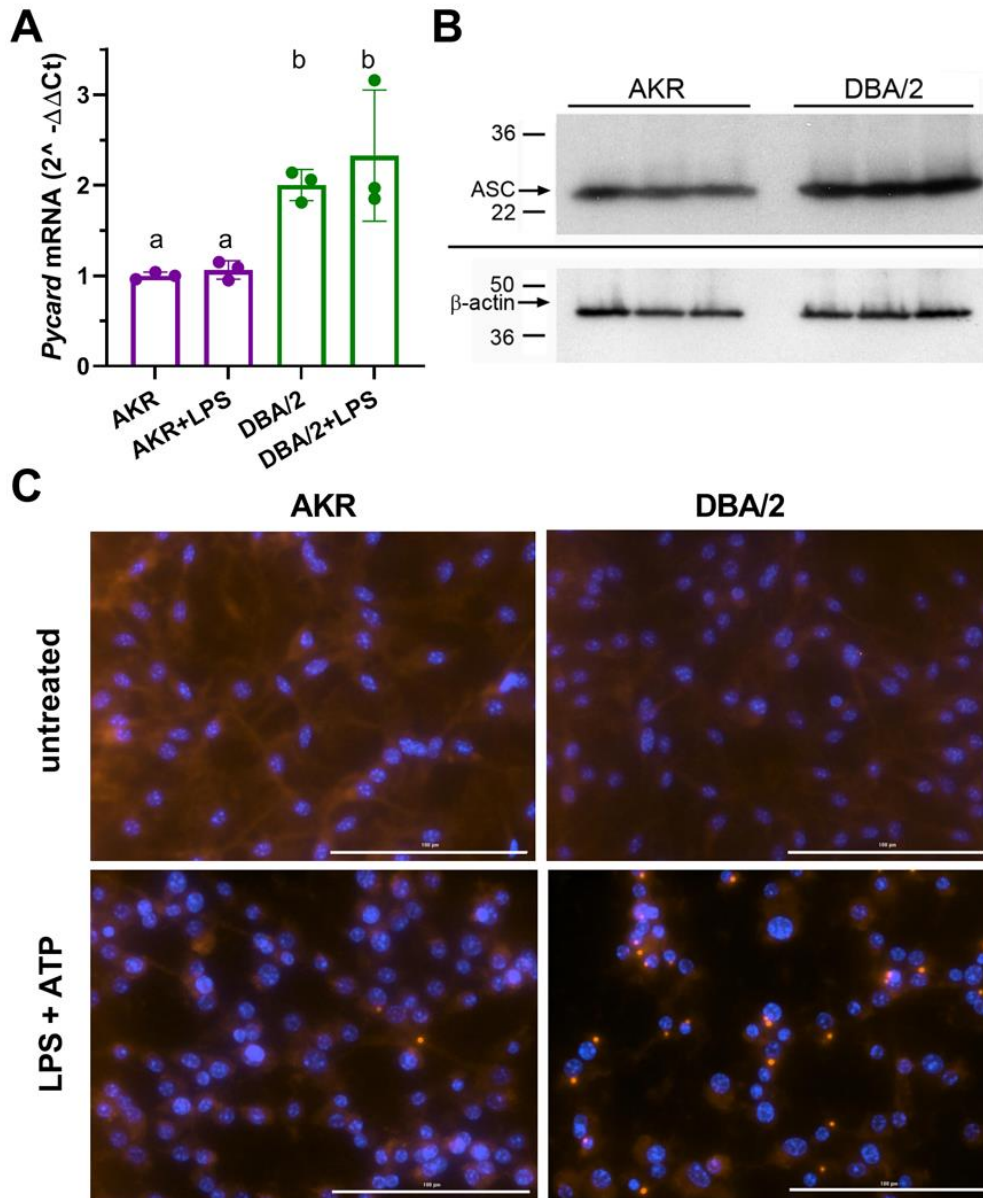

593

594 **Figure 2. Strain effects on *Pycard*/ACS expression and inflammasome speck formation.** **A.** Relative  
595 *Pycard* mRNA levels in AKR (magenta) and DBA/2 (green) BMDM, showing no induction by LPS (different  
596 letters above columns show  $p < 0.05$  by ANOVA Tukey posttest, mean and SD shown). Median of  
597 technical triplicates of biological triplicates plotted, representative of 2 independent experiments. **B.**  
598 Western blot for ASC (top) and  $\beta$ -actin (bottom) in biological triplicate lysates from AKR and DBA/2  
599 BMDM. Densitometric analysis revealed a 50% increase in the ASC/ $\beta$ -actin ratio ( $p < 0.01$  by 2-tailed t-  
600 t-test). **C.** Immunofluorescent staining for ACS specks (red) showing assembled inflammasomes and nuclei  
601 (blue) in AKR and DBA/2 BMDM with or without inflammasome priming and activation by LPS (4 h) +  
602 ATP (30 min) treatment.

603

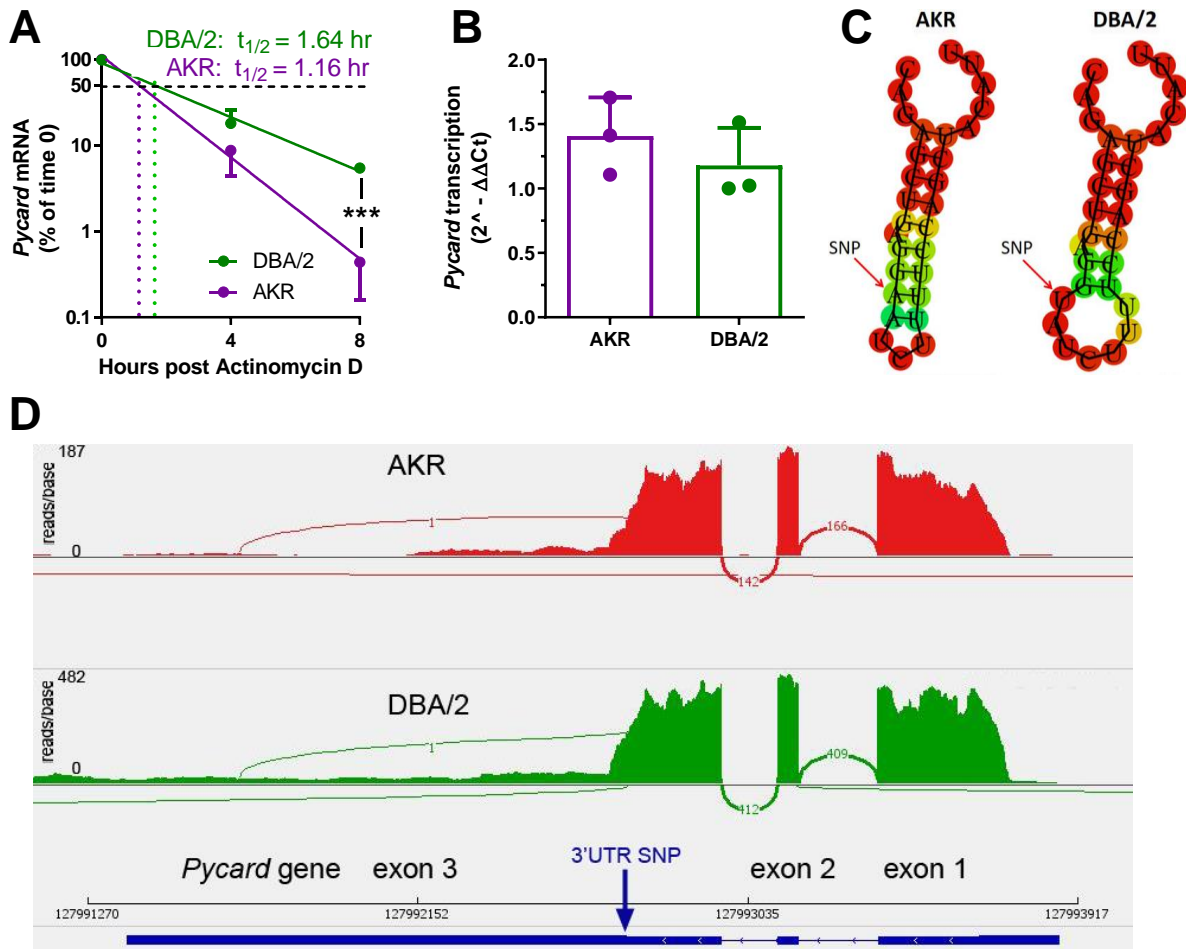

604

605 **Figure 3. Strain effect on *Pycard* mRNA turnover and structure.** **A.** Semi-log plot of *Pycard* mRNA  
 606 turnover after Actinomycin D treatment of AKR (magenta) and DBA/2 (green) BMDM (\*\*\*,  $p < 0.001$  by  
 607 two-tailed t-test). Each point is the mean  $\pm$  SD of biological triplicates using the mean of technical  
 608 triplicates. **B.** Relative level of *Pycard* mRNA run-on transcription in AKR (magenta) and DBA/2 (green)  
 609 BMDM (not significant by two-tailed t-test). Biological triplicates, mean and SD shown. **C.** Predicted  
 610 structure of AKR and DBA/2 *Pycard* mRNA segments near the 3'UTR SNP. **D.** Sashimi plot of exon  
 611 junctional reads and read depth histogram (IGV browser view) of RNaseq from AKR and DBA/2 BMDM,  
 612 with the *Pycard* gene exon-intron structure below (gene on lower strand, 5' to 3' from right to left).

613

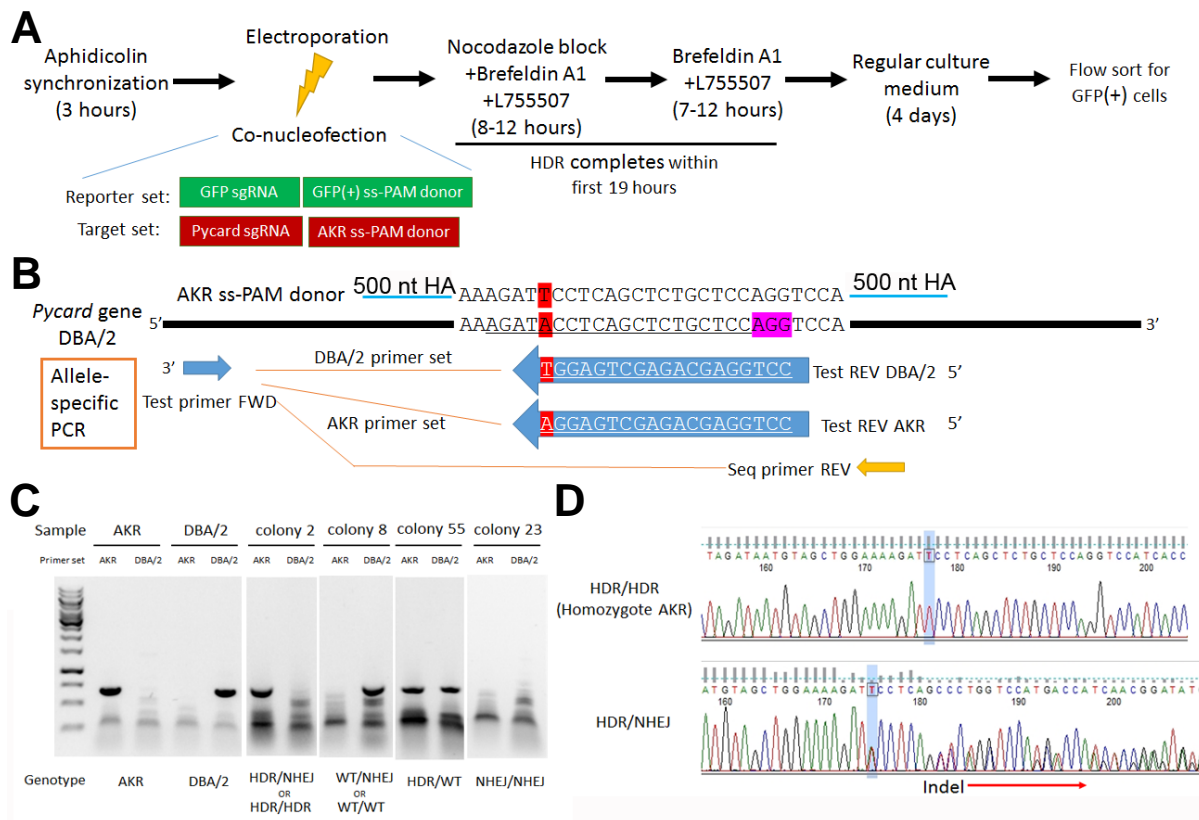

614

615 **Figure 4. *Pycard* gene editing of ES cells to convert the DBA/2 allele to the AKR allele. A.** Strategy used  
616 to decrease NHEJ by use of HDR reporter and small molecules to modulate cell cycle and inhibit NHEJ. **B.**  
617 Sequence of the AKR allele ss donor (3'UTR SNP highlighted in red) with 500 nt homology arm (HA),  
618 which will change the SNP from DBA/2 to AKR and eliminate Cas9 re-cutting, since the SNP is within the  
619 sgRNA sequence (underlined in the DBA/2 gene sequence). The sequence of the AKR and DBA/2 allele  
620 allele specific PCR reverse primers are also shown with the SNP at the 3' end, along with the positions of the  
621 common forward primer and the reverse PCR primer used for sequencing the edited clonally derived  
622 genomic DNA. **C.** Example of allele-specific PCR using AKR and DBA/2 genomic controls, and DNA from  
623 expanded colonies after gene editing. Genotypes cannot all be distinguished, as one of both alleles may  
624 be edited by NHEJ precluding DNA amplification. **D.** Sanger sequencing of DNA after gene editing  
625 showing a homozygous HDR conversion to the AKR allele (top) and a compound heterozygous with  
626 editing to one AKR allele and one indel allele due to NHEJ (bottom).

627

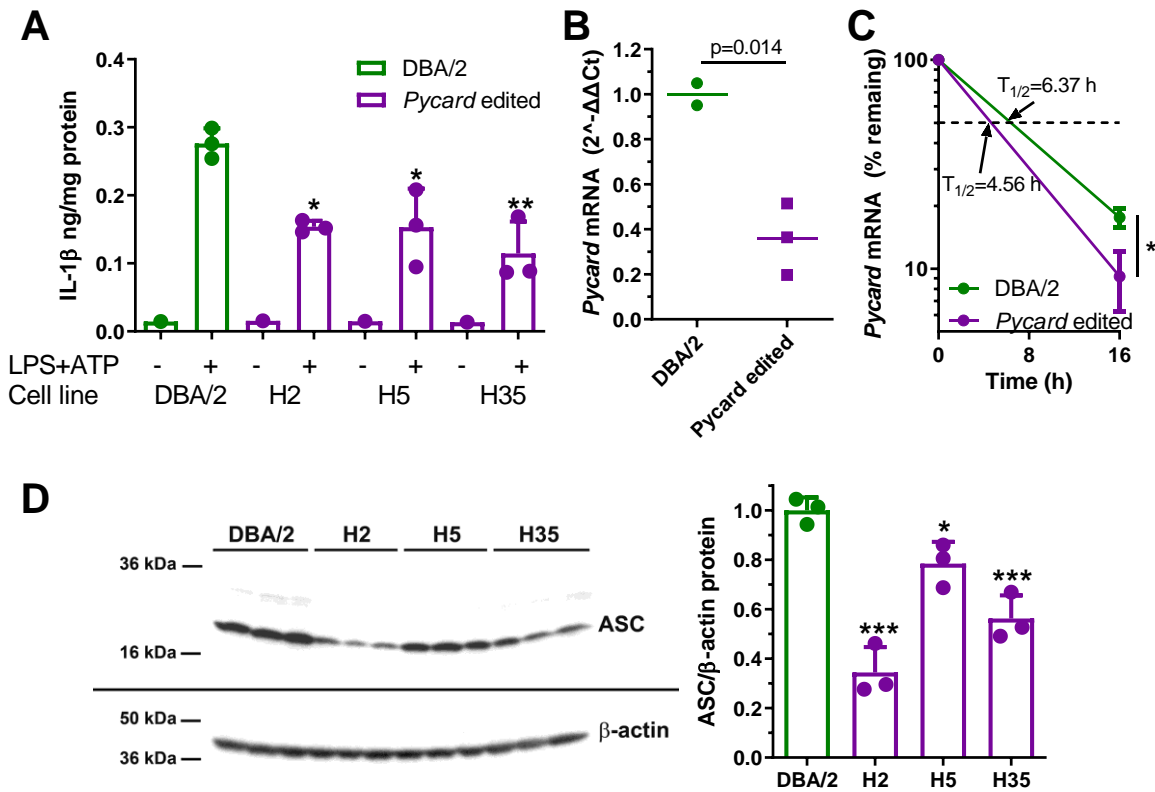

628

629 **Figure 5. Gene editing alters IL-1β release and *Pycard* expression in ESDM.** **A.** IL-1β release from ESDM  
630 derived from DBA/2 ES (green) and three independent homozygous *Pycard* edited ES lines (magenta), in  
631 the absence or presence of inflammasome priming and activation with LPS + ATP (each point is a  
632 biological replicate; \*,  $p < 0.05$ ; \*\*,  $p < 0.01$  vs DBA/2 derived ESDM in the presence of LPS + ATP by  
633 ANOVA with Dunnett's multiple comparisons test, mean and SD shown). **B.** *Pycard* mRNA levels in two  
634 DBA/2 ESDM differentiations and three independent homozygous *Pycard* edited ESDM ( $p = 0.014$  by two-  
635 tailed t-test). Each point is a biological replicate of qPCR technical triplicates, mean shown. **C.** Semi-log  
636 plot of *Pycard* mRNA turnover after Actinomycin D treatment of ESDM derived from two differentiations  
637 of DBA/2 ES and three independent homozygous *Pycard* edited ES lines (magenta), (\*,  $p < 0.05$  by two-  
638 tailed t-test). Each point is the average of biological triplicates of qPCR technical triplicates, mean and SD  
639 shown. **D.** Left side, western blot for ASC (top) and β-actin (bottom) from ESDM lysates derived from  
640 DBA/2 ES and three independent homozygous *Pycard* edited ES lines. Right side, densitometry of  
641 western blot showing ASC levels are lower in all three *Pycard* edited cell lines (\*,  $p < 0.05$ ; \*\*\*,  $p < 0.001$   
642 vs. DBA/2 derived ESDM by ANOVA with Dunnett's multiple comparisons test, mean and SD shown).

## Supplemental Files

## Supplemental Table S1. Genes within the *Irm3* QTL interval

| Gene Name     | Chr      | Gene Mb Position | Gene Description                                                                             | Mb from LOD peak | eQTL LOD <sup>a</sup> | inflammasome <sup>b</sup> | il-1b <sup>b</sup> | SNPs <sup>c</sup> | PROVEAN <sup>d</sup> |
|---------------|----------|------------------|----------------------------------------------------------------------------------------------|------------------|-----------------------|---------------------------|--------------------|-------------------|----------------------|
| Bcl7c         | 7        | 134.81           | B cell CLL/lymphoma 7C                                                                       | 0.00             | -                     | 0                         | 0                  | 0                 | 0                    |
| Mir762        | 7        | 134.85           | microRNA 762                                                                                 | 0.05             | -                     | 0                         | 0                  | 0                 | 0                    |
| Ctf1          | 7        | 134.86           | cardiotrophin 1                                                                              | 0.05             | -                     | 0                         | 0                  | 0                 | 0                    |
| Ctf2          | 7        | 134.86           | cardiotrophin 2                                                                              | 0.06             | -                     | 0                         | 0                  | 0                 | 0                    |
| Fbxl19        | 7        | 134.89           | F-box and leucine-rich repeat protein 19                                                     | 0.09             | -                     | 0                         | 0                  | 0                 | 0                    |
| Orai3         | 7        | 134.91           | ORAI calcium release-activated calcium modulator 3                                           | 0.11             | -                     | 0                         | 0                  | 0                 | 0                    |
| Setd1a        | 7        | 134.92           | SET domain containing 1A                                                                     | 0.12             | -                     | 0                         | 1                  | 0                 | 0                    |
| Hsd3b7        | 7        | 134.93           | hydroxy-delta-5-steroid dehydrogenase, 3 beta- and steroid delta-isomerase 7                 | 0.13             | -                     | 0                         | 0                  | 0                 | 0                    |
| Stx1b         | 7        | 134.95           | syntaxin 1B                                                                                  | 0.14             | -                     | 0                         | 0                  | 0                 | 0                    |
| Stx4a         | 7        | 134.97           | syntaxin 4A (placental)                                                                      | 0.16             | -                     | 0                         | 0                  | 0                 | 0                    |
| AC149222.1    | 7        | 135.00           | -                                                                                            | 0.20             | -                     | 0                         | 0                  | 0                 | 0                    |
| Zfp668        | 7        | 135.01           | zinc finger protein 668                                                                      | 0.20             | -                     | 0                         | 0                  | 0                 | 0                    |
| Zfp646        | 7        | 135.02           | zinc finger protein 646                                                                      | 0.22             | -                     | 0                         | 0                  | 1                 | 0                    |
| Prss53        | 7        | 135.03           | protease, serine, 53                                                                         | 0.23             | -                     | 0                         | 0                  | 0                 | 0                    |
| Vkorc1        | 7        | 135.03           | vitamin K epoxide reductase complex, subunit 1                                               | 0.23             | -                     | 0                         | 1                  | 0                 | 0                    |
| Bckdk         | 7        | 135.05           | branched chain ketoacid dehydrogenase kinase                                                 | 0.24             | -                     | 0                         | 0                  | 0                 | 0                    |
| Myst1         | 7        | 135.06           | MYST histone acetyltransferase 1                                                             | 0.25             | -                     | 0                         | 0                  | 0                 | 0                    |
| Prss8         | 7        | 135.07           | protease, serine, 8 (prostasin)                                                              | 0.27             | -                     | 0                         | 0                  | 0                 | 0                    |
| Prss36        | 7        | 135.08           | protease, serine, 36                                                                         | 0.27             | -                     | 0                         | 0                  | 0                 | 0                    |
| Fus           | 7        | 135.11           | fusion, derived from t(12;16) malignant liposarcoma (human)                                  | 0.31             | -                     | 0                         | 3                  | 0                 | 0                    |
| Gm17468       | 7        | 135.13           | predicted gene, 17468                                                                        | 0.32             | -                     | 0                         | 0                  | 0                 | 0                    |
| B230325K18Rik | 7        | 135.13           | RIKEN cDNA B230325K18 gene                                                                   | 0.32             | -                     | 0                         | 0                  | 0                 | 0                    |
| <b>Pycard</b> | <b>7</b> | <b>135.14</b>    | <b>PYD and CARD domain containing</b>                                                        | <b>0.33</b>      | <b>20</b>             | <b>323</b>                | <b>200</b>         | <b>0</b>          | <b>0</b>             |
| Gm15533       | 7        | 135.15           | predicted gene 15533                                                                         | 0.34             | -                     | 0                         | 0                  | 0                 | 0                    |
| Trim72        | 7        | 135.15           | tripartite motif-containing 72                                                               | 0.34             | -                     | 0                         | 0                  | 0                 | 0                    |
| Itgam         | 7        | 135.21           | integrin alpha M                                                                             | 0.40             | -                     | 2                         | 17                 | 0                 | 0                    |
| U1            | 7        | 135.21           | U1 spliceosomal RNA                                                                          | 0.40             | -                     | 1                         | 9                  | 0                 | 0                    |
| Itgax         | 7        | 135.27           | integrin alpha X                                                                             | 0.47             | -                     | 1                         | 1                  | 0                 | 0                    |
| Itgad         | 7        | 135.30           | integrin, alpha D                                                                            | 0.49             | -                     | 0                         | 0                  | 0                 | 0                    |
| Cox6a2        | 7        | 135.35           | cytochrome c oxidase, subunit VI a, polypeptide 2                                            | 0.55             | -                     | 0                         | 0                  | 0                 | 0                    |
| 9130023H24Rik | 7        | 135.38           | RIKEN cDNA 9130023H24 gene                                                                   | 0.57             | -                     | 0                         | 0                  | 0                 | 0                    |
| Arm5c         | 7        | 135.38           | armadillo repeat containing 5                                                                | 0.58             | -                     | 0                         | 0                  | 0                 | 0                    |
| Tgfb1i1       | 7        | 135.39           | transforming growth factor beta 1 induced transcript 1                                       | 0.59             | -                     | 0                         | 3                  | 0                 | 0                    |
| Slc5a2        | 7        | 135.41           | solute carrier family 5 (sodium/glucose cotransporter), member 2                             | 0.61             | -                     | 0                         | 1                  | 0                 | 0                    |
| BC017158      | 7        | 135.41           | cDNA sequence BC017158                                                                       | 0.61             | -                     | 0                         | 0                  | 0                 | 0                    |
| Mir3103       | 7        | 135.43           | microRNA 3103                                                                                | 0.63             | -                     | 0                         | 0                  | 0                 | 0                    |
| Rgs10         | 7        | 135.52           | regulator of G-protein signalling 10                                                         | 0.71             | 2.6                   | 0                         | 0                  | 0                 | 0                    |
| Gm15503       | 7        | 135.55           | predicted gene 15503                                                                         | 0.75             | -                     | 0                         | 0                  | 0                 | 0                    |
| Tial1         | 7        | 135.58           | Tia1 cytotoxic granule-associated RNA binding protein-like 1                                 | 0.78             | -                     | 0                         | 2                  | 0                 | 0                    |
| AC130474.1    | 7        | 135.62           | -                                                                                            | 0.82             | -                     | 0                         | 0                  | 0                 | 0                    |
| Bag3          | 7        | 135.67           | BCL2-associated athanogene 3                                                                 | 0.86             | -                     | 0                         | 0                  | 1                 | 0                    |
| Inpp5f        | 7        | 135.75           | inositol polyphosphate-5-phosphatase F                                                       | 0.95             | -                     | 0                         | 0                  | 0                 | 0                    |
| Gm16044       | 7        | 135.84           | predicted gene 16044                                                                         | 1.03             | -                     | 0                         | 0                  | 0                 | 0                    |
| Mcmbp         | 7        | 135.84           | MCM (minichromosome maintenance deficient) binding protein                                   | 1.04             | -                     | 0                         | 0                  | 0                 | 0                    |
| U6            | 7        | 135.88           | U6 spliceosomal RNA                                                                          | 1.07             | -                     | 0                         | 2                  | 0                 | 0                    |
| Sec23ip       | 7        | 135.89           | Sec23 interacting protein                                                                    | 1.08             | -                     | 0                         | 0                  | 0                 | 0                    |
| n-R5s158      | 7        | 135.92           | nuclear encoded rRNA 5S 158                                                                  | 1.11             | -                     | 0                         | 0                  | 0                 | 0                    |
| AC136741.1    | 7        | 135.97           | -                                                                                            | 1.17             | -                     | 0                         | 0                  | 0                 | 0                    |
| Ppapdc1a      | 7        | 136.40           | phosphatidic acid phosphatase type 2 domain containing 1A                                    | 1.60             | -                     | 0                         | 0                  | 0                 | 0                    |
| Wdr11         | 7        | 136.74           | WD repeat domain 11                                                                          | 1.93             | -                     | 0                         | 0                  | 0                 | 0                    |
| U6            | 7        | 137.18           | U6 spliceosomal RNA                                                                          | 2.37             | -                     | 0                         | 2                  | 0                 | 0                    |
| Fgfr2         | 7        | 137.31           | fibroblast growth factor receptor 2                                                          | 2.50             | -                     | 0                         | 4                  | 0                 | 0                    |
| Gm5903        | 7        | 137.50           | predicted gene 5903                                                                          | 2.69             | -                     | 0                         | 0                  | 0                 | 0                    |
| Ate1          | 7        | 137.54           | arginyltransferase 1                                                                         | 2.73             | -                     | 0                         | 0                  | 0                 | 0                    |
| Nsmce4a       | 7        | 137.68           | non-SMC element 4 homolog A ( <i>S. cerevisiae</i> )                                         | 2.87             | -                     | 0                         | 0                  | 0                 | 0                    |
| Tacc2         | 7        | 137.72           | transforming, acidic coiled-coil containing protein 2                                        | 2.92             | -                     | 0                         | 1                  | 0                 | 0                    |
| Etos1         | 7        | 137.91           | ectopic ossification 1                                                                       | 3.11             | -                     | 0                         | 0                  | 0                 | 0                    |
| Btbd16        | 7        | 137.92           | BTB (POZ) domain containing 16                                                               | 3.11             | -                     | 0                         | 0                  | 0                 | 0                    |
| Mir5102       | 7        | 137.98           | microRNA 5102                                                                                | 3.17             | -                     | 0                         | 0                  | 0                 | 0                    |
| Gm5602        | 7        | 138.00           | predicted gene 5602                                                                          | 3.20             | -                     | 0                         | 0                  | 0                 | 0                    |
| Plekha1       | 7        | 138.01           | pleckstrin homology domain containing, family A (phosphoinositide binding specific) member 1 | 3.21             | -                     | 0                         | 0                  | 0                 | 0                    |
| Htra1         | 7        | 138.08           | HtrA serine peptidase 1                                                                      | 3.28             | -                     | 0                         | 1                  | 0                 | 0                    |
| Dmbt1         | 7        | 138.18           | deleted in malignant brain tumors 1                                                          | 3.37             | -                     | 0                         | 0                  | 3                 | 0                    |
| 4933402N03Rik | 7        | 138.28           | RIKEN cDNA 4933402N03 gene                                                                   | 3.48             | -                     | 0                         | 0                  | 0                 | 0                    |
| 5430419D17Rik | 7        | 138.32           | RIKEN cDNA 5430419D17 gene                                                                   | 3.51             | -                     | 0                         | 0                  | 0                 | 0                    |
| Cuzd1         | 7        | 138.45           | CUB and zona pellucida-like domains 1                                                        | 3.65             | -                     | 0                         | 0                  | 0                 | 0                    |

a, LOD score for cis-eQTL based on our prior BMDM strain intercross (Reference: J Hsu & JD Smith, PMID: 23525445 DOI: 10.1161/JAHA.112.005421)

b, total number of PubMed hits for Boolean queries of the respective gene name and terms of interest.

c, non-synonymous SNPs between AKR and DBA/2 mice.

d, PROVEAN, number of SNPs predicted to be deleterious by PROVEAN software.

Yellow highlighting, top candidate gene.

## Supplemental Table S2. *Pycard* gene sequencing PCR primer pairs

|            |                           |                                |
|------------|---------------------------|--------------------------------|
| Forward_1  | GTCCCCATCCCTGCTTCCTCTCAC  | 4855 bp after TSS <sup>a</sup> |
| Reverse_1  | CCAAACAGCCCTACGCATCTCCAG  | 3467 bp after TSS              |
| Forward_2  | GTGGGGCTTGAGACTGCTGGTGA   | 4063 bp after TSS              |
| Reverse_2  | TGGAGGGAATGAAGTTGATAGGTG  | 2836 bp after TSS              |
| Forward_3  | CCAGGGCTTGTATGTAGAGGTCA   | 3100 bp after TSS              |
| Reverse_3  | ATTTTGGGGGTGGGGCTGTTTCATA | 1806 bp after TSS              |
| Forward_4  | TATGAACAGCCCCACCCCAAAAT   | 1829 bp after TSS              |
| Reverse_4  | GGCTCCCCACCCTACCACACC     | 757 bp after TSS               |
| Forward_5: | GAAGCCTTTGCACTAGAATGGAGA  | 1387 bp after TSS              |
| Reverse_5: | ATGGGGCGGGCACGAGATG       | 213 bp after TSS               |
| Forward_6: | TGCGCCCATAGCCTTCTCG       | 329 after TSS                  |
| Reverse_6: | AGCCTTAGCCCTTCCAACCCAACC  | 456 bp before TSS              |

<sup>a</sup>, TSS, transcription start site.
